# Supplementary material
Source: HighWire-hosted journal article supplement (https://www.cmaj.ca/content/suppl/2010/06/07/cmaj.090313)
Supplement: imm-para-8-at.pdf [file imm-para-8-at.pdf]

## Appendix 8: Intestinal parasites – *Strongyloides* and *Schistosoma*: evidence review for newly arriving immigrants and refugees

Kamran Khan MD MPH, Christine Heidebrecht MSc, Jennifer Sears BSc, Angie Chan MPA, Meb Rashid MD, Christina Greenaway MD MSc, William Stauffer MD MSPH, Lavanya Narasiah MD MSc, Kevin Pottie MD MClSc; for the Canadian Collaboration for Immigrant and Refugee Health

Division of Infectious Diseases, (Khan) University of Toronto, Centre for Research on Inner City Health, (Khan, Heidebrecht, Sears, Chan) St. Michael's Hospital, Toronto; Department of Family and Community Medicine (Rashid), University of Toronto; Department of Medicine (Greenaway), McGill University, Division of Infectious Diseases and Clinical Epidemiology and Community Services Unit, SMBD Jewish General Hospital, Montreal; Department of Medicine, Division of Infectious Diseases and International Medicine and the Department of Pediatrics, Infectious Diseases (Stauffer), University of Minnesota; PRAIDA Clinic CSSS de la Montagne - site Côtés-des-Neiges (Narasiah), Montreal; Departments of Family Medicine and Epidemiology and Community Medicine, Centre for Global Health, Institute of Population Health and C.T. Lamont Primary Health Care Research Centre, Élisabeth Bruyère Research Institute (Pottie), University of Ottawa.

### ABSTRACT

**Background:** An estimated one third of the world's population harbours intestinal parasites. Most of these infections can only be sustained through repeated infectious exposures, however strongyloidiasis and schistosomiasis are two parasitic infections that can persist for years to decades after a single exposure. These infections can persist sub-clinically, evade detection if insensitive diagnostic tests are used, and if left untreated, lead to life threatening complications. Consequently, these infections have considerable public health relevance to populations emigrating from developing areas of the world – where these parasites are prevalent – to industrialized areas of the world where they are non-endemic.

**Methods:** We conducted an evidence review to estimate the burden of strongyloidiasis and schistosomiasis in populations emigrating from developing areas of the world. We then systematically assessed evidence on the diagnosis and treatment of these two intestinal parasitic infections including: benefits and harms, applicability, clinical considerations and implementation issues. Quality of the evidence was assessed using the GRADE approach.

**Results:** Evidence for an increased burden of parasitic infection is greatest in refugee populations originating from Southeast Asia and Africa (i.e. strongyloidiasis), and Africa (i.e. schistosomiasis). Serologic testing is the most sensitive modality currently available to detect either parasite. Short courses of ivermectin and praziquantel are well tolerated and highly effective in treating strongyloidiasis and schistosomiasis respectively.

**Interpretation:** Strongyloidiasis and schistosomiasis are sufficiently prevalent to warrant targeted screening of newly arriving (i.e. within five years), high-risk refugee populations. Early detection and treatment of infected individuals can avert future morbidity and death.

**Competing interests:** None declared.

**Contributors:** All of the authors contributed to the conception and refinements of the study design and the analysis and interpretation of the data. Kamran Khan drafted the initial manuscript, and all of the other authors provided critical revisions. All of the authors approved the final manuscript submitted for publication.

**Acknowledgements:** We would like to thank Ayesha Ratnayake, Ricardo Batista and Roo Deinstadt for their editing and formatting support. Additionally, we would like to acknowledge Lynn Dunikowski for providing expert librarian support.

**Funding:** The authors would like to acknowledge the funding support of the Canadian Institutes of Health Research Institute of Health Services and Policy Research, the Champlain Local Health Integration Network, and the Calgary Refugee Program. The Public Health Agency of Canada (PHAC) contributed funding for the development and publication of reviews of the scientific evidence on select topics related to PHAC programs of work. The conclusions and recommendations made in the guidelines were independently developed by the Canadian Collaboration for Immigrant and Refugee Health. The views expressed in this report are the views of the authors and do not necessarily reflect those of PHAC and other funders.

## The cases

Charles is a 32 year old engineer from Liberia who is in the process of immigrating to Canada as a refugee, and plans to resettle in Toronto. He discusses living in a refugee camp in nearby Ghana for several years during the civil war in Liberia.

Su Lin is a 15 year old refugee from Myanmar who is landing in Canada with her family and is planning to attend school in Saskatoon. She states she is healthy.

How would you approach these patients?

## Introduction

Approximately one third of the world's population is infected with intestinal parasites,<sup>1</sup> most of which are sustained through cycles of repeated exposure from the environment. When populations emigrate from parts of the world where intestinal parasites are endemic and resettle in countries where they do not exist, most infections will clear without treatment within a few years of immigrating. Two intestinal parasitic infections – strongyloidiasis and schistosomiasis – are notable exceptions in that they can persist for decades as sub-clinical infections or as low-grade disease with non-specific clinical manifestations. In the presence of immunosuppression, strongyloidiasis can rapidly evolve into life-threatening disseminated disease (i.e. hyperinfection), while schistosomiasis can result in serious complications causing future morbidity and death. We conducted an evidence review to guide primary care practitioners in the early detection and treatment of strongyloidiasis and schistosomiasis for newly arriving refugees. Recommendations for screening and treating these parasites are found in Box 1.

## Methods

We used the 14-step methods approach developed by the Canadian Collaboration for Immigrant and Refugee Health. We constructed a clinician summary table to highlight the population of interest, epidemiology, clinical considerations and potential key clinical actions (Appendix 3). We then constructed a logic model (see Figure 1: Logic Model) to define the clinical preventive action, outcomes, and key questions.

*Search strategy for systematic reviews, guidelines and population-specific literature*

Together with an information specialist, we developed a search strategy to identify systematic reviews, guidelines,

### Box 1: Recommendations on screening for strongyloidiasis and schistosomiasis from the Canadian Collaboration for Immigrant and Refugee Health

#### Strongyloidiasis

Screen refugees newly arriving from low-income countries in Southeast Asia and Africa with serology for strongyloidiasis and treat if positive with ivermectin (first line) or albendazole (if contraindications to ivermectin).

#### Basis of recommendation

- **Balance of benefits and harms:** Strongyloidiasis is estimated to affect 100 million people worldwide. Among immigrant populations, refugees from Southeast Asia and Africa appear to have the highest risk of infection. Sub-clinical infections or low-grade disease can persist for decades after immigration and in the presence of immunosuppression may transform into life-threatening disseminated disease. Serology is the most sensitive diagnostic modality currently available. Treatment with ivermectin is of short duration, is highly effective, (NNT 2, CI ~1 to 3) and has a favourable side effect profile.
- **Quality of evidence:** Moderate
- **Values and preferences:** The committee attributed more value to the availability of a highly sensitive and specific serologic test and effective treatment options to prevent potentially life-threatening disseminated disease than to the potential limitations of serology in distinguishing current from remote infection in high-risk newly arriving refugees.

#### Schistosomiasis:

Screen refugees newly arriving from Africa with serology for schistosomiasis and treat if positive with praziquantel.

#### Basis of recommendation

- **Balance of benefits and harms:** Schistosomiasis is estimated to affect 200 million people worldwide, of whom approximately 85% live in Africa. Among immigrant populations, refugees from Africa have the highest risk of infection. Sub-clinical infections or low-grade disease can persist for decades after immigration and may cause future morbidity or death. Serology is the most sensitive diagnostic modality currently available. Treatment with praziquantel is of short duration, is highly effective, (NNT 4, CI ~1 to 124) and has a favourable side effect profile.
- **Quality of evidence:** Moderate
- **Values and preferences:** The committee attributed more value to the availability of a highly sensitive and specific serologic test and effective treatment to prevent future morbidity or death than to the limitations of serology in distinguishing current from remote infection in high-risk newly arriving refugees.

Figure 1: Logic model

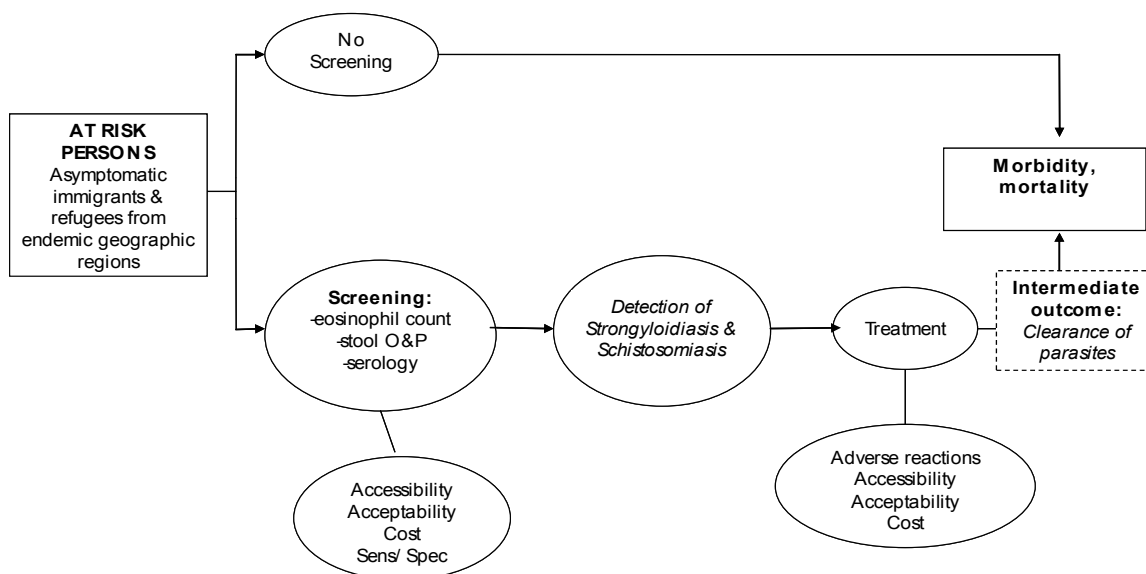

peer reviewed and non-peer reviewed medical literature in order to evaluate evidence regarding:

- Diagnostic methods to detect strongyloidiasis and schistosomiasis in immigrant and refugee populations*
- Treatment for strongyloidiasis and schistosomiasis and its effect on long-term morbidity and mortality*

In addition to a systematic search on diagnostic methods and treatment, our team performed a non-systematic, but rigorous search on the burden and epidemiology of strongyloidiasis and schistosomiasis in populations around the world. The following electronic databases were searched: MEDLINE, MEDLINE In-Process and Other Non-Indexed Citations, EMBASE, Cochrane CRCT, Cochrane DSR, ACP Journal Club, Cochrane MR, DARE, HTA, NHSEE (date ranges: January 1, 1988- January 1, 2010 (screening); January 1, 1980- January 1, 2010 (treatment)). In addition, the following databases and resources were hand searched for screening guidelines (using a combination of key words including schistosomiasis, strongyloidiasis, *Schistosoma*, *Strongyloides*, screen, immigrant, refugee, asylee, depending on the database): TRIPdatabase (Turning Research Into Practice), Canadian Task Force on Preventive Health Care, U.S. Preventive Services Task Force, National Guidelines Clearinghouse, NICE Clinical Guidelines, Canadian Agency for Drugs and Technologies in Health, National Library of Guidelines Specialist Library (UK), Canadian Medical Association Infobase, WHO Health Evidence Network, CDC. The findings were independently assessed for inclusion by two team

members, first by title and then by abstract content, based on eligibility criteria determined *a priori*. Manuscripts that were deemed relevant based on abstract content were then retrieved and reviewed by multiple team members.

## Selection Criteria

### Diagnostic Studies

- Reports on at least strongyloidiasis or *intestinal* schistosomiasis
- Population comprised of immigrants, refugees or asylum seekers
- Setting(s) where strongyloidiasis and schistosomiasis are non-endemic
- Evaluates sensitivity, specificity, or predictive value of eosinophil counts, stool examinations for ova and parasites, and/or serology
- Sample size of at least 100 *individuals*
- Date range: 1988-2009

### Treatment Studies

- Investigates effect of treatment with albendazole or ivermectin for strongyloidiasis and praziquantel for *intestinal* schistosomiasis
- Evaluates outcomes on morbidity or mortality at least 12 months after treatment
- Sample size of at least 100 *individuals*
- Date range: 1980-2009

Note: These searches were not limited to systematic reviews, guidelines, or meta-analyses.

### *Justification of selection criteria*

In our literature review of diagnostic modalities, we included only those studies involving immigrant or refugee populations resettling in countries where strongyloidiasis and schistosomiasis are non-endemic. We did this because i) a greater intensity of parasitic infection among individuals living in endemic countries could influence the sensitivity of diagnostic tests, ii) the experience of persons performing diagnostic tests such as stool microscopy may be greater in parasite endemic countries, and iii) the cycle of reinfection in endemic countries could complicate interpretation of the value of diagnostic tests.

In our review of treatment modalities, we included studies conducted in both parasite endemic and non-endemic countries. Studies in endemic countries were considered because a demonstration of treatment effectiveness in such settings implies that treatment in non-endemic settings should be at least comparable, and potentially more effective (i.e. since the cycle of reinfection in non-endemic countries would be interrupted). We focused on studies that had at least one year of follow up post-treatment in order to fully evaluate the longer-term effects of treatment on morbidity or mortality. For both our diagnostic and treatment reviews, we restricted our searches to include studies with at least 100 *individuals* (i.e. not 100 specimens) in order to draw robust conclusions.

### *Synthesis of evidence and values*

We synthesized the evidence from systematic reviews, guidelines and treatment studies using GRADE summary of findings tables, which assesses both the relative and absolute effects of interventions. We also appraised the quality of evidence for each outcome using the GRADE quality assessment tool, which assesses study limitations, directness, precision, consistency, and publication bias across all studies (Box 2). In the review of clinical considerations we report on implementation issues. Finally, we identify leading gaps in the research evidence base.

## Results

Our search strategy for a systematic review of the literature yielded 5039 articles, while an additional 150 articles were identified through an open-ended search process. The titles of all 5189 articles were reviewed, from which 445 abstracts were evaluated for their potential relevance to this review. 437 abstracts were subsequently eliminated because they did not fulfil our search strategy's inclusion criteria (Appendix 1). Of the

remaining 8 manuscripts, 5 pertained to the diagnosis of strongyloidiasis<sup>2-5</sup> or schistosomiasis<sup>6</sup>, while the remaining 3 pertained to their treatment.<sup>7-9</sup> Although our search did not identify any systematic reviews on the diagnosis of either parasite or the treatment of strongyloidiasis, we found a systematic review pertaining to the treatment of schistosomiasis.<sup>8</sup> Furthermore, we found two major health guidelines pertaining to the evaluation and management of parasitic infections in newly arriving refugees.<sup>10,11</sup>

### **What is the burden of strongyloidiasis and schistosomiasis among immigrant populations?**

Quantifying the parasitic burden of infection is challenging since existing studies do not involve systematic or random testing of immigrant populations. Most estimates of burden were derived from small observational studies and primarily included refugees from selected countries. Furthermore, a significant number of these studies utilized stool microscopy – a diagnostic test known to have limited sensitivity in the detection of either parasite.

In the case of strongyloidiasis, existing data are primarily derived from refugee populations originating from Southeast Asia and Africa (Appendix 2). Studies using stool microscopy have reported prevalences of infection between 0.8% and 4.3%,<sup>12-17</sup> with the highest burden identified in refugees from Southeast Asia.<sup>12,18</sup> Studies using serologic enzyme immunoassays have reported significantly higher prevalences of infection between 9% and 77%,<sup>19-26</sup> with the highest burden identified in refugees from Southeast Asia<sup>27-29</sup> and Africa.<sup>30-32</sup>

Approximately 85% of the global burden of schistosomiasis is believed to exist in Africa.<sup>33</sup> Studies using stool microscopy to detect schistosomiasis in African refugee populations have reported prevalences from 0.4% to 7%.<sup>34-37</sup> In contrast, studies using serologic enzyme immunoassays have reported significantly higher prevalences<sup>38-46</sup> ranging from 2.2% in East African pediatric populations<sup>47</sup> to 64% and 73% in Sudanese and Somali refugees respectively.<sup>48,49</sup>

### **Does screening for strongyloidiasis or schistosomiasis decrease morbidity?**

The scope and analytic horizon of existing studies prevents establishment of a direct link between screening for strongyloidiasis or schistosomiasis and an improvement in health outcomes. The association can be made indirectly however, since highly sensitive and specific diagnostic tests are currently available to detect

each parasite and effective treatment is known to mitigate the risk of future morbidity or death.

*Screening*

Stool microscopy for ova and parasites is the only definitive way to confirm the presence of intestinal infection with either parasite, however this diagnostic modality has suboptimal sensitivity. Although overall sensitivity can be improved by increasing the number of stool specimens examined, the costs associated with this approach can be substantial and patients are frequently reluctant to provide healthcare providers with multiple specimens. While the sensitivity of a single stool examination to detect *Strongyloides* is estimated at just 30%, it increases to over 90% when seven specimens are examined.<sup>50</sup>

By contrast, serologic testing is the most sensitive diagnostic modality to detect strongyloidiasis and schistosomiasis, making them ideal screening tools. Although these tests can produce false positive results due to cross-reactions with other helminth parasites, they

do have a high degree of specificity. Serological testing for schistosoma is limited in that it cannot discriminate between species typically causing intestinal disease (e.g. *S. mansoni*, *S. japonicum*) and *S. hematobium*, which causes disease of the bladder and urinary system. While a positive serologic test can indicate infection with *S. hematobium*, confirmation requires urine examination for ova and parasites. The National Reference Centre for Parasitology in Montreal – which performs serologic tests for both parasites in Canada – estimates that their enzyme immunoassays have a sensitivity and specificity of 100% and 88% (*Strongyloides stercoralis*) and 96% and 82% (*Schistosoma mansoni*). While several studies have reported *Strongyloides* antibody levels declining post-treatment<sup>51-55</sup> – suggesting that serologic positivity is indicative of current infection – this has not been a universal finding.<sup>56</sup> By contrast, *Schistosoma* antibody levels do not appear to decline post-treatment.<sup>57</sup> Nonetheless, given the potential for these infections to persist for decades and cause potentially life-threatening disease, it is generally presumed that a positive serologic

**Table 1 Ivermectin compared to pyrvinium pamoate for strongyloidiasis**

**Patient or Population:** Patients with strongyloidiasis

**Settings:** Okinawa, Japan

**Intervention:** Ivermectin

**Comparison:** Pyrvinium pamoate

| Outcomes                                                                       | Absolute Effect                          |                                                    | Relative effect (95% CI) | No of Participants (studies) | Quality of the evidence (GRADE) | Comments                                                                                                                                                                                                                                               |
|--------------------------------------------------------------------------------|------------------------------------------|----------------------------------------------------|--------------------------|------------------------------|---------------------------------|--------------------------------------------------------------------------------------------------------------------------------------------------------------------------------------------------------------------------------------------------------|
|                                                                                | Risk of treatment with pyrvinium pamoate | Difference with treatment with ivermectin (95% CI) |                          |                              |                                 |                                                                                                                                                                                                                                                        |
| Cure rate                                                                      | 233 per 1000                             | 969 per 1000 (610 to 1000)                         | RR 4.16 (2.62 to 6.59)   | 127 (1 study)                | moderate <sup>1</sup>           | (NNT 2, CI ~1 to 3)                                                                                                                                                                                                                                    |
| Common adverse effects with treatment (pruritis, fever, lymph node tenderness) |                                          |                                                    |                          |                              |                                 | Pre-treatment assessment for <i>Loa loa</i> infection is recommended in any patient emigrating from endemic areas (West and Central Africa); serious and/or fatal encephalopathy has been reported (rarely) during treatment in patients with loiasis. |

CI: Confidence interval; RR: Risk ratio;

GRADE Working Group grades of evidence

**High quality:** Further research is very unlikely to change our confidence in the estimate of effect.

**Moderate quality:** Further research is likely to have an important impact on our confidence in the estimate of effect and may change the estimate.

**Low quality:** Further research is very likely to have an important impact on our confidence in the estimate of effect and is likely to change the estimate.

**Very low quality:** We are very uncertain about the estimate.

<sup>1</sup> Not randomized, no blinding

test for either parasite in high-risk newly arriving (i.e. within five years) refugee populations – without a history of recent effective treatment – represents current infection.

#### *Role of eosinophilia in detection of intestinal helminths*

In some instances the diagnosis of strongyloidiasis and schistosomiasis (i.e. and other helminth infections) may be implied by the presence of peripheral blood eosinophilia. Although eosinophilia can result from a number of different etiologies, in immigrants and refugees newly arriving from areas of the world where intestinal parasites are prevalent, it is frequently a sign of a helminth infection. Given that eosinophilia typically occurs in response to tissue invasion by a parasite, it occurs intermittently and may be missed if a single complete blood count (CBC) is examined. Since CBCs are frequently performed, the sensitivity of eosinophilia as an indirect marker of helminth infection can be increased by examining a patient's white blood cell count differentials over time.

#### *Relative benefits and harms of treatment*

The detection and subsequent treatment of strongyloidiasis and schistosomiasis can prevent future morbidity and potentially life-threatening complications. A two-day course of ivermectin (200 µg/kg orally once daily) is the preferred treatment strategy for strongyloidiasis, however among refugees from *Loa loa* endemic areas of the world, a seven-day course of albendazole (400 mg orally twice daily) should be used. This is because cases of encephalopathy have been reported with ivermectin use during large-scale treatment campaigns in parts of West and Central Africa, where *Loa loa* is endemic (see Table of *Loa loa* endemic countries in the following reference).<sup>10,58</sup> This rare but potentially serious event may occur in persons who have a high load of *Loa loa* microfilaria, which are rapidly killed with ivermectin. Alternatively, since ivermectin is the most effective treatment option available for strongyloidiasis, healthcare providers may screen refugees at risk for *Loa loa* infection with day microfilaria blood levels and treat with ivermectin if high-level microfilaremia is not identified. For schistosomiasis species found in Africa (i.e. *S. mansoni*, *S. intercalatum* and *S. hematobium*), a one-day course of praziquantel (40 mg/kg divided in two doses) is the preferred treatment strategy. Treatment with ivermectin or praziquantel in patients with underlying neurocysticercosis can lead to an acute inflammatory reaction and precipitate seizure activity. Thus, these drugs should not be used in persons with known neurocysticercosis or an unexplained seizure

disorder. Otherwise, ivermectin, albendazole and praziquantel each have a generally favourable side effect profile.<sup>59</sup>

## Clinical considerations

This review proposes that refugees emigrating from areas of the world known to be endemic for strongyloidiasis and schistosomiasis, be screened for these parasites within five years of their arrival into Canada. With limited data on the burden of these two parasites in non-refugee immigrant populations, there is currently insufficient evidence to justify universal screening of non-refugee populations even though some high-risk groups may be missed.<sup>60</sup> However, clinicians should consider testing foreign-born persons for strongyloidiasis and/or schistosomiasis if they have lived in areas of the world where these parasites are endemic and (i) have compatible signs and/or symptoms of infection (independent of the time elapsed since their arrival into Canada) and/or (ii) have evidence of peripheral blood eosinophilia.<sup>71</sup> While this review focuses on refugees arriving from regions of the world where there is strong evidence of an elevated burden of infection, further research is needed to better identify the specific geographic origins of populations at greatest risk. Clinicians should also be aware that persons infected with the retrovirus HTLV-1 have a modified immune response that complicates the treatment of *Strongyloides*. Since some areas of the world are endemic for both *Strongyloides* and HTLV-1, clinicians should consider screening persons for HTLV-1 if they (i) test positive for *Strongyloides* and originate from high prevalence areas for HTLV-1 (i.e. South America, the Caribbean Islands, Japan, and Africa) and/or (ii) have persistent *Strongyloides* infection that responds poorly to anti-parasitic treatment.

Finally, while studies in this review primarily involved adult refugees, children are well known to be at risk of infection with intestinal parasites. Consequently, screening newly arriving refugees of all ages from areas of the world endemic for strongyloidiasis and schistosomiasis is suggested. However, treatment with albendazole is not recommended in children under one year of age, ivermectin in children weighing less than 15kg or less than 90cm in length, and praziquantel in children under four years of age. Infected children in these circumstances should be referred to a practitioner experienced in the management of intestinal parasitic infections in pediatric populations.

Since serologic tests for strongyloidiasis and schistosomiasis are processed at the National Reference Laboratory for Parasitology in Montreal, practitioners

**Table 2: Praziquantel compared to placebo for schistosomiasis****Patient or population:** Patients with schistosomiasis**Settings:** Sudan, Zambia, Burundi, Democratic Republic of Congo, Kenya, Tanzania, Philippines, China, Republic of Congo and Niger**Intervention:** Praziquantel**Comparison:** Placebo

| Outcomes                                                            | Absolute Effect        |                                    | Relative effect (95% CI)  | No of Participants (studies) | Quality of the evidence (GRADE) | Comments              |
|---------------------------------------------------------------------|------------------------|------------------------------------|---------------------------|------------------------------|---------------------------------|-----------------------|
|                                                                     | Control group          | Difference with treatment (95% CI) |                           |                              |                                 |                       |
|                                                                     | Placebo                | Praziquantel                       |                           |                              |                                 |                       |
| Parasitological cure                                                |                        |                                    | RR 28.3<br>(1.8 to 441.6) | 69<br>(1 study)              | moderate <sup>1</sup>           | (NNT 4, CI ~1 to 124) |
| Side effects (1%-10%) dizziness, headache, malaise, abdominal pain) | Study population       |                                    | RR 6.0<br>(2.9 to 12.5)   | 436<br>(1)                   |                                 |                       |
|                                                                     | 60 per 1000            | 361 per 1000<br>(173 to 750)       |                           |                              |                                 |                       |
|                                                                     | Medium risk population |                                    |                           |                              |                                 |                       |
|                                                                     | 60 per 1000            | 361 per 1000<br>(173 to 750)       |                           |                              |                                 |                       |

CI: Confidence interval; RR: Risk ratio;

GRADE Working Group grades of evidence

**High quality:** Further research is very unlikely to change our confidence in the estimate of effect.**Moderate quality:** Further research is likely to have an important impact on our confidence in the estimate of effect and may change the estimate.**Low quality:** Further research is very likely to have an important impact on our confidence in the estimate of effect and is likely to change the estimate.**Very low quality:** We are very uncertain about the estimate.<sup>1</sup> No details on randomization or blinding

may experience delays between the time of specimen collection and receipt of test results. If patients require treatment for strongyloidiasis with ivermectin or albendazole, these drugs must be obtained via Health Canada's Special Access Program. Instructions on how to obtain these medications can be found on Health Canada's website.<sup>61</sup> By contrast, praziquantel can be obtained locally via a physician prescription.

Serologic testing post-treatment for schistosomiasis is not recommended to evaluate treatment success, as these antibodies tend to persist over time. By comparison, several studies have reported declining *Strongyloides* antibody titres six to twelve months after successful treatment,<sup>62-66</sup> and hence have advocated the use of serology as a marker for clearance of this parasite. Although there is a body of evidence demonstrating this post-treatment effect,<sup>67-71</sup> this finding has not been universally observed.<sup>72</sup> While a practice of post-treatment serologic testing may be considered by practitioners, at a minimum all treated individuals should be followed prospectively for clinical signs and symptoms of persistent infection and to ensure that eosinophil counts remain within or return to normal limits within six-months of receiving effective treatment. If patients have

persistent symptoms and/or eosinophilia after six months, further investigations – including the

option of repeat *Strongyloides* serology – should be pursued.

## Recommendations of other groups

Two sets of national guidelines offer recommendations on the diagnosis and management of intestinal parasites in refugee populations. The U.S. Centers for Disease Control and Prevention “*Guidelines for Evaluation of Refugees for Intestinal and Tissue-Invasive Parasitic Infections during Domestic Medical Examination*”<sup>10</sup> and The Australasian Society for Infectious Diseases “*Diagnosis, Management and Prevention of Infections in Recently Arrived Refugees*”<sup>11</sup> support the use of serology as part of the screening process for strongyloidiasis and schistosomiasis.

## The cases revisited

Given his risk profile, Charles is screened for strongyloidiasis and schistosomiasis with serology and both tests come back positive. He is also noted to have an elevated eosinophil count. He remains free of gastrointestinal or other symptoms, but is interested in

treatment to prevent potential future morbidity. Since Liberia and Ghana – two countries where Charles has lived – are not endemic for *Loa loa*<sup>58</sup> he is prescribed ivermectin for the treatment of strongyloidiasis. He is also prescribed praziquantel for the treatment of schistosomiasis. Prospectively, Charles' eosinophil count is monitored and returns to normal levels over the next several months.

Su Lin is tested for strongyloidiasis and her serology comes back positive. Her eosinophil count is within normal limits. She is currently asymptomatic but does have a history of asthma, for which she uses puffers on an as needed basis. She has never been prescribed oral corticosteroids. You wonder if her history of asthma may in fact be a clinical manifestation of strongyloidiasis. After discussing the ability for *Strongyloides* to persist (i.e. through autoinfection) and the possibility of future disseminated disease (i.e. hyperinfection), Su Lin expresses interest in receiving treatment. You contact the Special Access Program at Health Canada to obtain ivermectin and prescribe this to her the following week.

## Conclusion and research needs

Intestinal parasitic infections with the potential for long-term persistence such as strongyloidiasis and schistosomiasis are sufficiently prevalent in subgroups of newly arriving refugees to warrant post-arrival screening. Serologic testing is the most sensitive diagnostic modality currently available to detect each parasite. Early treatment of infected individuals can alter the natural history of infection and avert future morbidity or death. More research is needed to better define the burden of infection in immigrant and refugee populations originating from areas of the world where strongyloidiasis is known to exist.

## Key points

- Strongyloidiasis and schistosomiasis are parasitic infections that can persist for years to decades and consequently can cause serious morbidity or death long after an immigrant resettles in a new country.
- The burden of strongyloidiasis appears greatest in refugee populations originating from Southeast Asia and Africa, while the burden of schistosomiasis is greatest in refugee populations from Africa.
- Consider testing foreign-born persons for strongyloidiasis and/or schistosomiasis if they have lived in areas of the world where these parasites are endemic and (i) have compatible signs and/or

symptoms of infection and/or (ii) have evidence of peripheral blood eosinophilia.

- Detection of strongyloidiasis or schistosomiasis is limited by sub-clinical infection or low-grade disease and by suboptimal sensitivity of stool microscopy. Serologic testing however significantly enhances diagnostic sensitivity.

Box 2: Grading of Recommendations Assessment, Development and Evaluation Working Group grades of evidence ([www.gradeworkinggroup.org](http://www.gradeworkinggroup.org))

**High quality:** Further research is very unlikely to change our confidence in the estimate of effect.

**Moderate quality:** Further research is likely to have an important impact on our confidence in the estimate of effect and could change the estimate.

**Low quality:** Further research is very likely to have an important impact on our confidence in the estimate of effect and is likely to change the estimate.

**Very low quality:** We are very uncertain about the estimate.

## REFERENCES

1. Chan MS. The global burden of intestinal nematode infections--fifty years on. *Parasitology Today* 1997; 13(11):438-43.
2. Boulware DR, Stauffer WM, Hendel-Paterson BR, Rocha JL, Seet RC, Summer AP et al. Maltreatment of Strongyloides infection: case series and worldwide physicians-in-training survey. *American Journal of Medicine* 2007; 120(6):545 e1-8.
3. Genta RM. Predictive value of an enzyme-linked immunosorbent assay (ELISA) for the serodiagnosis of strongyloidiasis. *American Journal of Clinical Pathology* 1988; 89(3):391-4.
4. Sudarshi S, Stumpfle R, Armstrong M, Ellman T, Parton S, Krishnan P et al. Clinical presentation and diagnostic sensitivity of laboratory tests for Strongyloides stercoralis in travellers compared with immigrants in a non-endemic country. *Tropical Medicine & International Health* 2003; 8(8):728-32.
5. Gyorkos TW, Genta RM, Viens P, MacLean JD. Seroepidemiology of Strongyloides infection in the Southeast Asian refugee population in Canada. *American Journal of Epidemiology* 1990; 132(2):257-64.
6. Whitty CJ, Mabey DC, Armstrong M, Wright SG, Chiodini PL. Presentation and outcome of 1107 cases of schistosomiasis from Africa diagnosed in a non-endemic country. *Transactions of the Royal Society of Tropical Medicine & Hygiene* 2000; 94(5):531-34.
7. Kumar V, Gryseels B. Use of praziquantel against schistosomiasis: a review of current status. *International Journal of Antimicrobial Agents* 1994; 4(4):313-20.
8. Saconato H, Atallah A. Interventions for treating schistosomiasis mansoni. *Cochrane Database of Systematic Reviews* 2000; (2):CD000528.
9. Toma H. Comparative studies on the efficacy of three antihelminthics on treatment of human strongyloidiasis in Okinawa, Japan. *The Southeast Asian Journal of Tropical Medicine and Public Health* 2000; 31(1):147-51.



10. Centers for Disease Control and Prevention. Guidelines for Evaluation of Refugees for Intestinal and Tissue-Invasive Parasitic Infections during Domestic Medical Examination. Available from: <http://198.246.98.21/immigrantrefugeehealth/pdf/intestinal-parasites-domestic.pdf>
11. Murray, R, David, J, Krause, V, Biggs, B-A, Lemoh, C, Benson, J, Paxton, G, Buttery, J, Hanson-Knarhoi, M, and Burgner, D. Diagnosis, management and prevention of infections in recently arrived refugees. Available from: [http://www.asid.net.au/downloads/ASIDRefugeeguidelinesfinal-asatJuly2008\\_000.pdf](http://www.asid.net.au/downloads/ASIDRefugeeguidelinesfinal-asatJuly2008_000.pdf)
12. Buchwald D, Lam M, Hooton TM. Prevalence of intestinal parasites and association with symptoms in Southeast Asian refugees. *Journal of Clinical Pharmacy & Therapeutics* 1920; (5):271-275.
13. Lifson AR, Thai D, O'Fallon A, Mills WA, Hang K. Prevalence of tuberculosis, hepatitis B virus, and intestinal parasitic infections among refugees to Minnesota. *Public Health Reports* 2002; 117(1):69-77.
14. Martin JA, Mak DB. Changing faces: A review of infectious disease screening of refugees by the Migrant Health Unit, Western Australia in 2003 and 2004. *Medical Journal of Australia* 2006; 185(11-12):607-10.
15. McLeod A, Reeve M. The health status of quota refugees screened by New Zealand's Auckland Public Health Service between 1995 and 2000. *New Zealand Medical Journal* 2005; 118(1224):U1702.
16. Miller JM, Boyd HA, Ostrowski SR, Cookson ST, Parise ME, Gonzaga PS et al. Malaria, intestinal parasites, and schistosomiasis among Barawan Somali refugees resettling to the United States: a strategy to reduce morbidity and decrease the risk of imported infections. *American Journal of Tropical Medicine & Hygiene* 2000; 62(1):115-21.
17. Molina CD, Molina MM, Molina JM. Intestinal parasites in southeast Asian refugees two years after immigration. *Western Journal of Medicine*, 1988; 149(4):422-5.
18. Molina CD, Molina MM, Molina JM. Intestinal parasites in southeast Asian refugees two years after immigration. *Western Journal of Medicine*, 1988; 149(4):422-5.
19. Brodine SK, Thomas A, Huang R, Harbertson J, Mehta S, Leake J et al. Community based parasitic screening and treatment of Sudanese refugees: application and assessment of Centers for Disease Control guidelines. *American Journal of Tropical Medicine & Hygiene* 80(3):425-30, 2009.
20. Caruana SR, Kelly HA, Ngeow JY, Ryan NJ, Bennett CM, Chea L et al. Undiagnosed and potentially lethal parasite infections among immigrants and refugees in Australia. *Journal of Travel Medicine* 2006; 13(4):233-9.
21. de Silva S, Saykao P, Kelly H, MacIntyre CR, Ryan N, Leydon J et al. Chronic Strongyloides stercoralis infection in Laotian immigrants and refugees 7-20 years after resettlement in Australia. *Epidemiology & Infection* 2002; 128(3):439-44.
22. Gyorkos TW, Genta RM, Viens P, MacLean JD. Seroepidemiology of Strongyloides infection in the Southeast Asian refugee population in Canada. *American Journal of Epidemiology* 1990; 132(2):257-64.
23. Posey DL, Blackburn BG, Weinberg M, Flagg EW, Ortega L, Wilson M et al. High prevalence and presumptive treatment of schistosomiasis and strongyloidiasis among African refugees. *Clinical Infectious Diseases* 2007; 45(10):1310-5.
24. Rice JE, Skull SA, Pearce C, Mulholland N, Davie G, Carapetis JR. Screening for intestinal parasites in recently arrived children from East Africa. *Journal of Paediatrics & Child Health* 2003; 39(6):456-9.
25. Seybolt LM, Christiansen D, Barnett ED. Diagnostic evaluation of newly arrived asymptomatic refugees with eosinophilia. *Clinical Infectious Diseases* 2006; 42(3):363-7.
26. Tiong AC, Patel MS, Gardiner J, Ryan R, Linton KS, Walker KA et al. Health issues in newly arrived African refugees attending general practice clinics in Melbourne. *Medical Journal of Australia* 185(11-12):602-6, 2006; 185(11-12):602-6.
27. Caruana SR, Kelly HA, Ngeow JY, Ryan NJ, Bennett CM, Chea L et al. Undiagnosed and potentially lethal parasite infections among immigrants and refugees in Australia. *Journal of Travel Medicine* 2006; 13(4):233-9.
28. de Silva S, Saykao P, Kelly H, MacIntyre CR, Ryan N, Leydon J et al. Chronic Strongyloides stercoralis infection in Laotian immigrants and refugees 7-20 years after resettlement in Australia. *Epidemiology & Infection* 2002; 128(3):439-44.
29. Gyorkos TW, Genta RM, Viens P, MacLean JD. Seroepidemiology of Strongyloides infection in the Southeast Asian refugee population in Canada. *American Journal of Epidemiology* 1990; 132(2):257-64.
30. Franco-Paredes C, Dismukes R, Nicolls D, Hidron A, Workowski K, Rodriguez-Morales A et al. Persistent and untreated tropical infectious diseases among sudanese refugees in the United States. *American Journal of Tropical Medicine & Hygiene* 2007; 77(4):633-5.
31. Posey DL, Blackburn BG, Weinberg M, Flagg EW, Ortega L, Wilson M et al. High prevalence and presumptive treatment of schistosomiasis and strongyloidiasis among African refugees. *Clinical Infectious Diseases* 2007; 45(10):1310-5.
32. Chitsulo L, Engels D, Montresor A, Savioli L. The global status of schistosomiasis and its control. *Acta Tropica* 2000; 77(1):47-51.
33. Garg PK, Perry S, Dorn M, Hardcastle L, Parsonnet J. Risk of intestinal helminth and protozoan infection in a refugee population. *American Journal of Tropical Medicine & Hygiene* 2005; 73(2):386-91.
34. Lifson AR, Thai D, O'Fallon A, Mills WA, Hang K. Prevalence of tuberculosis, hepatitis B virus, and intestinal parasitic infections among refugees to Minnesota. *Public Health Reports* 2002; 117(1):69-77.
35. Martin JA, Mak DB. Changing faces: A review of infectious disease screening of refugees by the Migrant Health Unit, Western Australia in 2003 and 2004. *Medical Journal of Australia* 2006; 185(11-12):607-10.
36. McLeod A, Reeve M. The health status of quota refugees screened by New Zealand's Auckland Public Health Service between 1995 and 2000. *New Zealand Medical Journal* 2005; 118(1224):U1702.
37. Caruana SR, Kelly HA, Ngeow JY, Ryan NJ, Bennett CM, Chea L et al. Undiagnosed and potentially lethal parasite infections among immigrants and refugees in Australia. *Journal of Travel Medicine* 2006; 13(4):233-9.
38. Davis J, Webber M. A prospective audit of 215 newly arrived African refugees. *Journal of Paediatric and Child Health* 2007; 42(Suppl 1):A11.
39. Franco-Paredes C, Dismukes R, Nicolls D, Hidron A, Workowski K, Rodriguez-Morales A et al. Persistent and untreated tropical infectious diseases among sudanese refugees in the United States. *American Journal of Tropical Medicine & Hygiene* 2007; 77(4):633-5.
40. Gibney KB, Mhrshahi S, Torresi J, Marshall C, Leder K, Biggs BA. The profile of health problems in African immigrants attending an infectious disease unit in Melbourne, Australia. *American Journal of Tropical Medicine & Hygiene* 2009; 80(5):805-11.
41. Posey DL, Blackburn BG, Weinberg M, Flagg EW, Ortega L, Wilson M et al. High prevalence and presumptive treatment of

- schistosomiasis and strongyloidiasis among African refugees. *Clinical Infectious Diseases* 2007; 45(10):1310-5.
42. Rice JE, Skull SA, Pearce C, Mulholland N, Davie G, Carapetis JR. Screening for intestinal parasites in recently arrived children from East Africa. *Journal of Paediatrics & Child Health* 2003; 39(6):456-9.
  43. Seybolt LM, Christiansen D, Barnett ED. Diagnostic evaluation of newly arrived asymptomatic refugees with eosinophilia. *Clinical Infectious Diseases* 2006; 42(3):363-7.
  44. Tiong AC, Patel MS, Gardiner J, Ryan R, Linton KS, Walker KA et al. Health issues in newly arrived African refugees attending general practice clinics in Melbourne. *Medical Journal of Australia* 185(11-12):602-6, 2006; 185(11-12):602-6.
  45. Rice JE, Skull SA, Pearce C, Mulholland N, Davie G, Carapetis JR. Screening for intestinal parasites in recently arrived children from East Africa. *Journal of Paediatrics & Child Health* 2003; 39(6):456-9.
  46. Franco-Paredes C, Dismukes R, Nicolls D, Hidron A, Workowski K, Rodriguez-Morales A et al. Persistent and untreated tropical infectious diseases among sudanese refugees in the United States. *American Journal of Tropical Medicine & Hygiene* 2007; 77(4):633-5.
  47. Posey DL, Blackburn BG, Weinberg M, Flagg EW, Ortega L, Wilson M et al. High prevalence and presumptive treatment of schistosomiasis and strongyloidiasis among African refugees. *Clinical Infectious Diseases* 2007; 45(10):1310-5.
  48. Nielsen PB, Mojon M. Improved diagnosis of strongyloides stercoralis by seven consecutive stool specimens. *Zentralblatt Fur Bakteriologie, Mikrobiologie, Und Hygiene - Series A, Medical Microbiology, Infectious Diseases, Virology, Parasitology* 1987; 263(4):616-8.
  49. Biggs BA, Caruana S, Mihrshahi S, Jolley D, Leydon J, Chea L et al. Management of chronic strongyloidiasis in immigrants and refugees: is serologic testing useful? *American Journal of Tropical Medicine & Hygiene* 2009; 80(5):788-91.
  50. Karunajeewa H, Kelly H, Leslie D, Leydon J, Saykao P, Biggs BA. Parasite-specific IgG response and peripheral blood eosinophil count following albendazole treatment for presumed chronic strongyloidiasis. *Journal of Travel Medicine* 2006; 13(2):84-91.
  51. Kobayashi J, Sato Y, Toma H, Takara M, Shiroma Y. Application of enzyme immunoassay for postchemotherapy evaluation of human strongyloidiasis. *Diagnostic Microbiology & Infectious Disease* 1994; 18(1):19-23.
  52. Lindo JF, Atkins NS, Lee MG, Robinson RD, Bundy DA. Short report: long-term serum antibody isotype responses to Strongyloides stercoralis filariform antigens in eight patients treated with ivermectin. *American Journal of Tropical Medicine & Hygiene* 1996; 55(5):474-6.
  53. Loutfy MR, Wilson M, Keystone JS, Kain KC. Serology and eosinophil count in the diagnosis and management of strongyloidiasis in a non-endemic area. *American Journal of Tropical Medicine & Hygiene* 2002; 66(6):749-52.
  54. Sudarshi S, Stumpfle R, Armstrong M, Ellman T, Parton S, Krishnan P et al. Clinical presentation and diagnostic sensitivity of laboratory tests for Strongyloides stercoralis in travellers compared with immigrants in a non-endemic country. *Tropical Medicine & International Health* 2003; 8(8):728-32.
  55. Whitty CJ, Mabey DC, Armstrong M, Wright SG, Chiodini PL. Presentation and outcome of 1107 cases of schistosomiasis from Africa diagnosed in a non-endemic country. *Transactions of the Royal Society of Tropical Medicine & Hygiene* 2000; 94(5):531-34.
  56. Centers for Disease Control and Prevention. Recommendations for Overseas Presumptive Treatment of Intestinal Parasites for Refugees Destined for the United States. Available from:<http://www.cdc.gov/immigrantrefugeehealth/pdf/intestinal-parasites-overseas.pdf>
  57. The Medical Letter. 2007 Treatment Guidelines from the Medical Letter: Drugs for Parasitic Infections. Available from:<http://secure.medicalletter.org/TG-article-89b>
  58. Lim S, Katz K, Krajden S, Fuksa M, Keystone JS, Kain KC. Complicated and fatal Strongyloides infection in Canadians: risk factors, diagnosis and management. *Canadian Medical Association Journal* 2004; 171(5):479-84.
  59. Health Canada. Drugs and Health Products. 2008 Available from:<http://www.hc-sc.gc.ca/dhp-mps/acces/drugs-drogués/index-eng.php>
  60. Biggs BA, Caruana S, Mihrshahi S, Jolley D, Leydon J, Chea L et al. Management of chronic strongyloidiasis in immigrants and refugees: is serologic testing useful? *American Journal of Tropical Medicine & Hygiene* 2009; 80(5):788-91.
  61. Karunajeewa H, Kelly H, Leslie D, Leydon J, Saykao P, Biggs BA. Parasite-specific IgG response and peripheral blood eosinophil count following albendazole treatment for presumed chronic strongyloidiasis. *Journal of Travel Medicine* 2006; 13(2):84-91.
  62. Kobayashi J, Sato Y, Toma H, Takara M, Shiroma Y. Application of enzyme immunoassay for postchemotherapy evaluation of human strongyloidiasis. *Diagnostic Microbiology & Infectious Disease* 1994; 18(1):19-23.
  63. Lindo JF, Atkins NS, Lee MG, Robinson RD, Bundy DA. Short report: long-term serum antibody isotype responses to Strongyloides stercoralis filariform antigens in eight patients treated with ivermectin. *American Journal of Tropical Medicine & Hygiene* 1996; 55(5):474-6.
  64. Loutfy MR, Wilson M, Keystone JS, Kain KC. Serology and eosinophil count in the diagnosis and management of strongyloidiasis in a non-endemic area. *American Journal of Tropical Medicine & Hygiene* 2002; 66(6):749-52.
  65. Biggs BA, Caruana S, Mihrshahi S, Jolley D, Leydon J, Chea L et al. Management of chronic strongyloidiasis in immigrants and refugees: is serologic testing useful? *American Journal of Tropical Medicine & Hygiene* 2009; 80(5):788-91.
  66. Karunajeewa H, Kelly H, Leslie D, Leydon J, Saykao P, Biggs BA. Parasite-specific IgG response and peripheral blood eosinophil count following albendazole treatment for presumed chronic strongyloidiasis. *Journal of Travel Medicine* 2006; 13(2):84-91.
  67. Kobayashi J, Sato Y, Toma H, Takara M, Shiroma Y. Application of enzyme immunoassay for postchemotherapy evaluation of human strongyloidiasis. *Diagnostic Microbiology & Infectious Disease* 1994; 18(1):19-23.
  68. Lindo JF, Atkins NS, Lee MG, Robinson RD, Bundy DA. Short report: long-term serum antibody isotype responses to Strongyloides stercoralis filariform antigens in eight patients treated with ivermectin. *American Journal of Tropical Medicine & Hygiene* 1996; 55(5):474-6.
  69. Loutfy MR, Wilson M, Keystone JS, Kain KC. Serology and eosinophil count in the diagnosis and management of strongyloidiasis in a non-endemic area. *American Journal of Tropical Medicine & Hygiene* 2002; 66(6):749-52.
  70. Sudarshi S, Stumpfle R, Armstrong M, Ellman T, Parton S, Krishnan P et al. Clinical presentation and diagnostic sensitivity of laboratory tests for Strongyloides stercoralis in travellers compared with immigrants in a non-endemic country. *Tropical Medicine & International Health* 2003; 8(8):728-32.

71. Lagace-Wiens PR, Harding GK. A Canadian immigrant with coinfection of *Strongyloides stercoralis* and human T-lymphotropic virus 1. *CMAJ* 2007; 177(5):451-3

**Correspondence to:** Dr. Kamran Khan, 30 Bond St. Toronto ON, M5B 1W8, Tel: 416-864-6060 ext. 77441, Fax: 416-864-5485; [khank@smh.ca](mailto:khank@smh.ca)

**Clinical preventive guidelines for newly arrived immigrants and refugees**

This document provides the review details for the CMAJ CCIRH Intestinal Parasites paper. The series was developed by the Canadian Collaboration for Immigrant and Refugee Health and published at [www.cmaj.ca](http://www.cmaj.ca).

Appendix 1: Figure 2

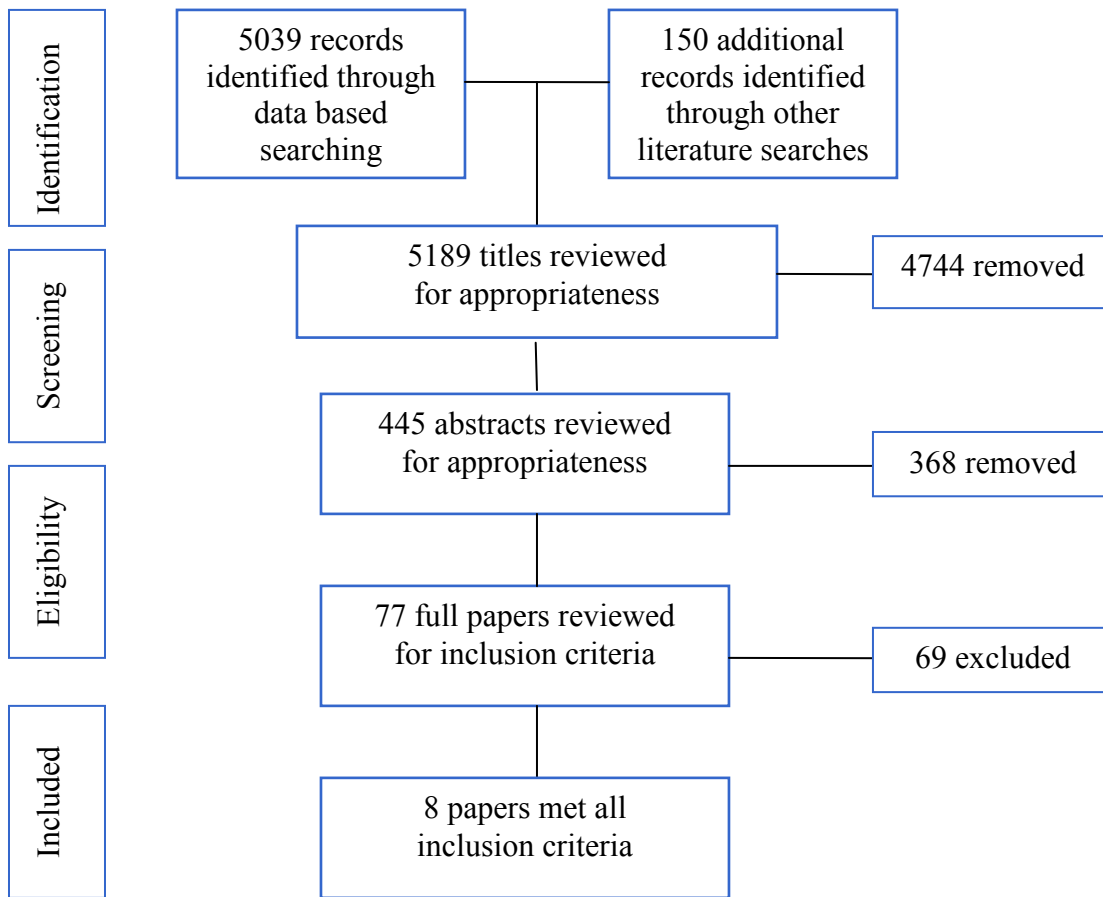

Figure 2: Search and selection flow sheet for screening and treatment articles.

## Appendix 2: Figure 3

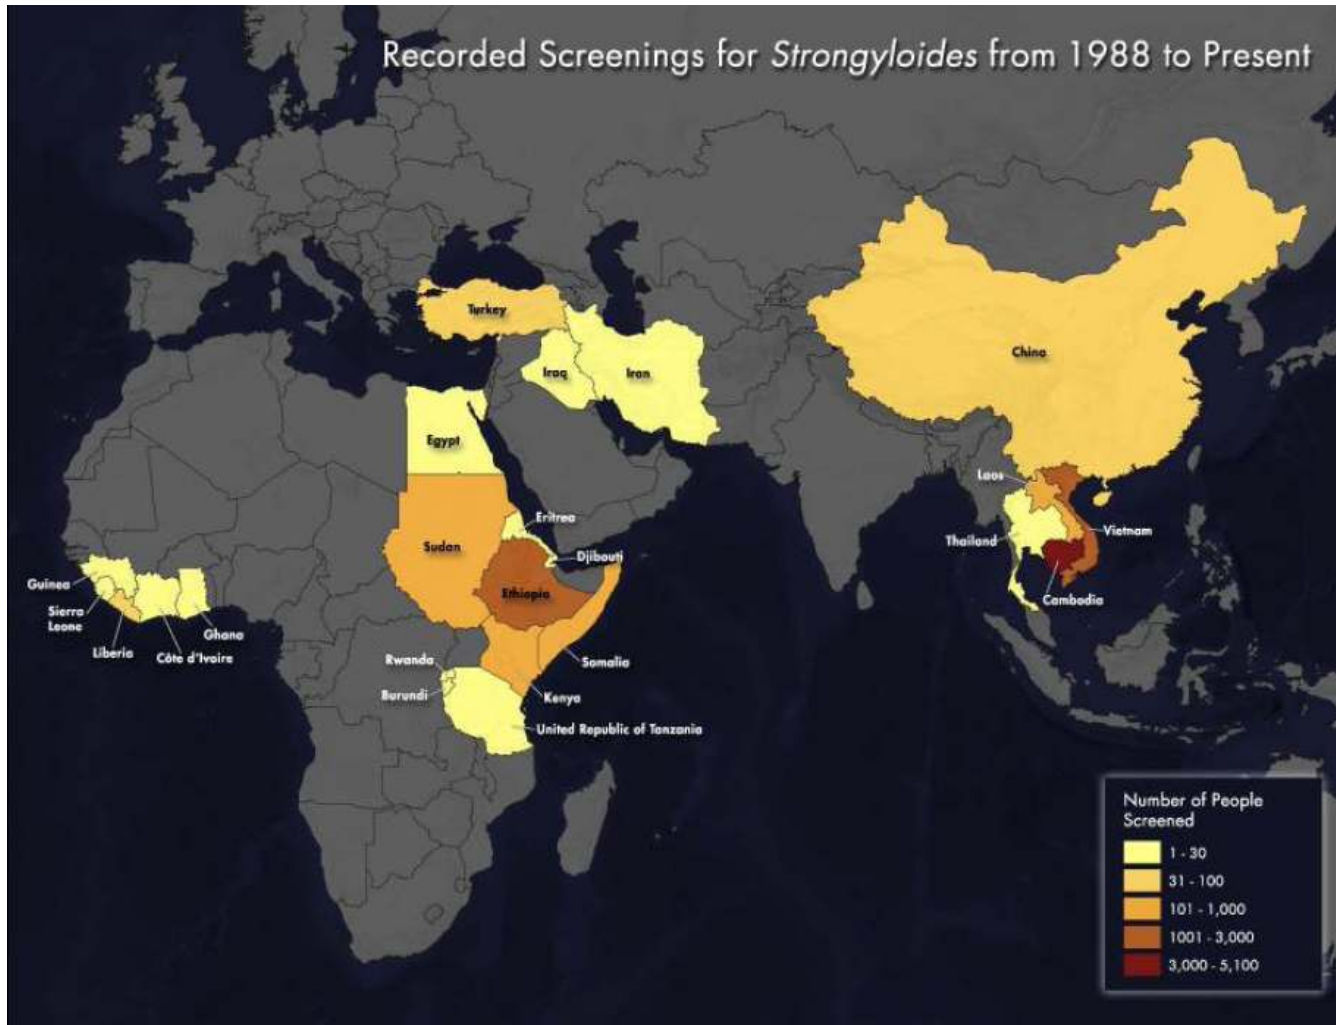

**Figure 3:** Number of immigrants or refugees screened for strongyloidiasis by birth country as identified in this review of the medical literature from 1988 and 2010.

### Appendix 3: Intestinal Parasites Evidence Based Clinician Summary Table

#### ***Strongyloidiasis***

Screen refugees newly arriving Southeast Asia and Africa with serology for strongyloidiasis and treat if positive with ivermectin (first line) or albendazole (if contraindications to ivermectin).

#### ***Schistosomiasis***

Screen refugees newly arriving (i.e. within five years) from Africa with serology for schistosomiasis and treat if positive with praziquantel.

**Global Burden:** Strongyloidiasis is estimated to affect 100 million people worldwide. While the *Strongyloides* parasite can be found throughout the developing world and even in some industrialized countries such as the United States and Australia, its burden appears to be greatest in low-income countries in Southeast Asia and Africa. Schistosomiasis is estimated to affect 200 million people worldwide, of whom approximately 85% live in Africa.

**Immigrant Burden:** For strongyloidiasis, studies using stool microscopy have reported prevalences of infection between 0.8% and 4.3%, with the highest burden identified in refugees from Southeast Asia. Studies using serologic enzyme immunoassays to detect strongyloidiasis have reported significantly higher prevalences of infection between 9% and 77%, with the highest burden identified in refugees from Southeast Asia and Africa. For schistosomiasis, studies using stool microscopy in African refugee populations have reported prevalences between 0.4% and 7%, while studies using serologic enzyme immunoassays have reported prevalences ranging from 2.2% in East African pediatric populations to 64% and 73% in Sudanese and Somali refugees respectively.

**Detection:** Both strongyloidiasis and schistosomiasis can persist as sub-clinical infection or low-grade disease with non-specific clinical manifestations for years to decades. Healthcare providers should be particularly mindful of each parasite's clinical spectrum of disease in immigrant and refugee populations, independent of the time elapsed since immigration. Eosinophilia may offer indirect evidence of strongyloidiasis or schistosomiasis.

**Diagnostics:** Stool microscopy for ova and parasites is the only definitive way to confirm the presence of strongyloidiasis or intestinal schistosomiasis, however this diagnostic modality has suboptimal sensitivity. By contrast, serologic testing is the most sensitive diagnostic modality to detect each parasite. The National Reference Centre for Parasitology – which performs serologic tests for both parasites in Canada – estimates that their enzyme immunoassays have a sensitivity and specificity of 100% and 88% (*Strongyloides stercoralis*) and 96% and 82% (*Schistosoma mansoni*).

**Treatment:** Treatment for each parasite is of short duration, is highly effective, and is generally well tolerated. Ivermectin is the preferred treatment for strongyloidiasis, while praziquantel should be used to treat schistosomiasis. Ivermectin can be obtained through Health Canada's Special Access Program.

**Special Considerations:** Individuals with strongyloidiasis who are emigrating from *Loa loa* endemic areas of the world should either (i) be tested for microfilaremia prior to treatment with ivermectin or (ii) be treated with albendazole. Providers may consider post-treatment serologic testing for strongyloidiasis to assess the effectiveness of treatment.
